# Supplementary material for: Moiety effect on the luminescent property of star-shaped triphenylamine (TPA) derivatives as mechanochromic materials
Source: Royal Society of Chemistry journal article supplement (doi:10.1039/c7ra03123h), 2017-01-01
Supplement: c7ra03123h1.pdf [file c7ra03123h1.pdf]

## Supporting Information

### Moiety effect on luminescent property of star-shaped triphenyl amine (TPA) derivatives as mechanochromic material

Ying Zhang,<sup>\*a</sup> Yao-Qin Feng,<sup>a</sup> Jun-Hao Wang,<sup>b</sup> Gaoyi Han,<sup>a</sup> Miao-Yu Li,<sup>\*a</sup> Yaoming Xiao,<sup>a</sup> Zhen-Dong Feng<sup>a</sup>

<sup>a</sup> Institute of Molecular Science, Key Laboratory of Energy conversation and storage of Shanxi Province, Shanxi University, Taiyuan 030006, PR China Email: yzhang@sxu.edu.cn; limiaoyu@sxu.edu.cn.

<sup>b</sup> Institute of Crystalline Materials, Shanxi University, Taiyuan 030006, PR China

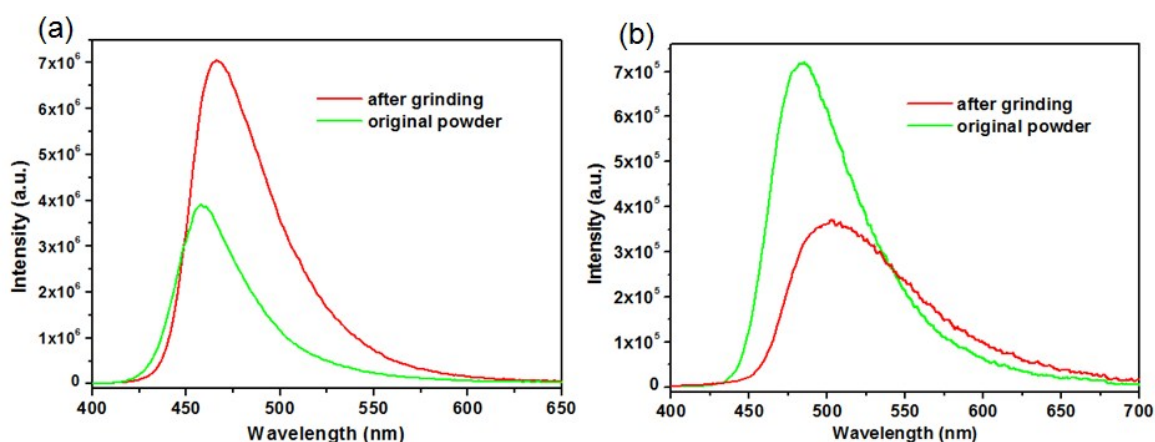

**Fig. S1.** The fluorescence spectra of original and ground powder of Ester-TPA (a) and COOH-TPA (b).

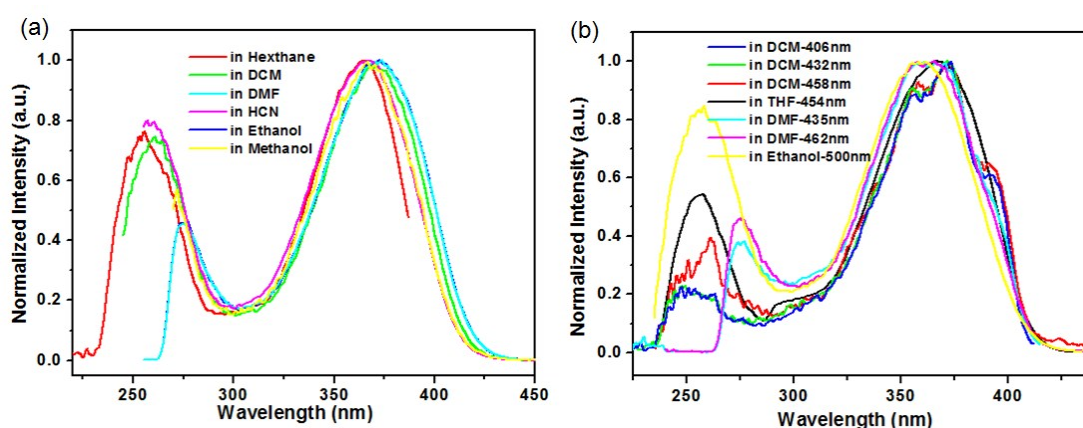

**Fig. S2.** The excitation spectra of Ester-TPA(a) and COOH-TPA(b) in different solvents.

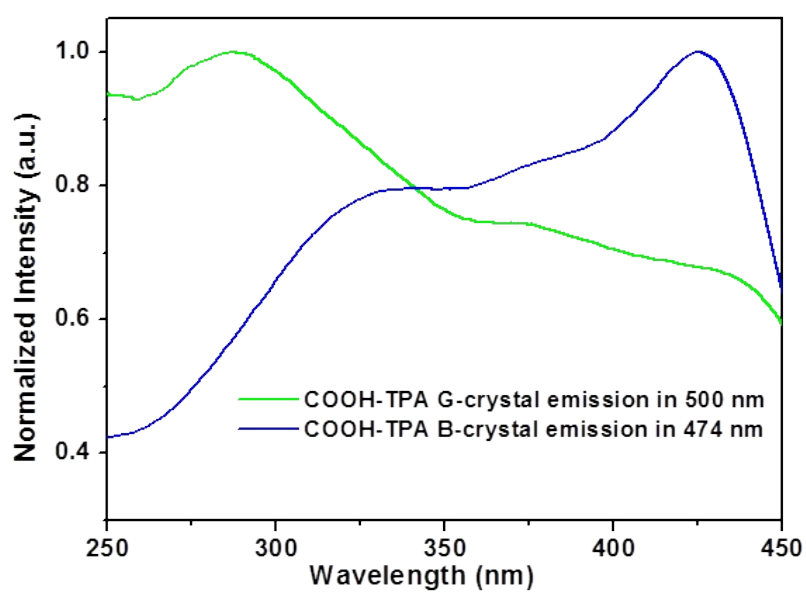

**Fig. S3.** The excitation spectra of B-crystal and G-crystal for COOH-TPA.

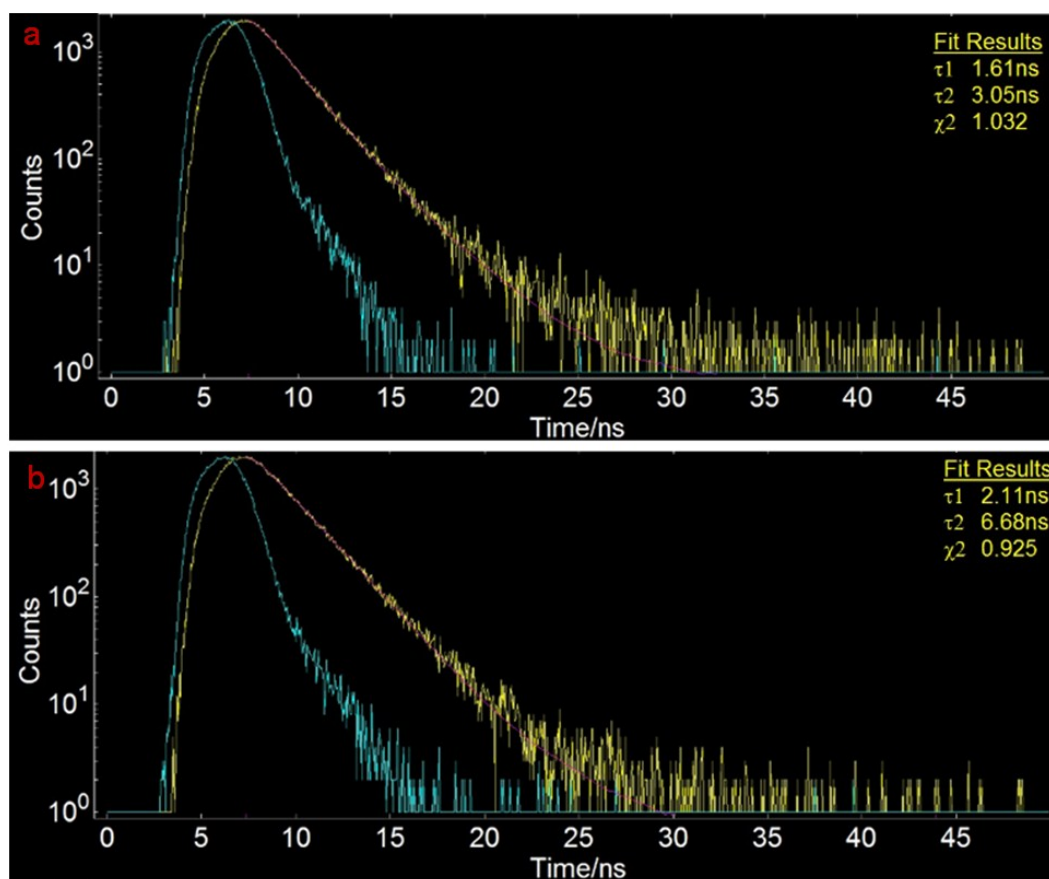

**Fig. S4.** The fluorescence lifetime spectra of Ester-TPA: original powder (a) and ground powder (b).

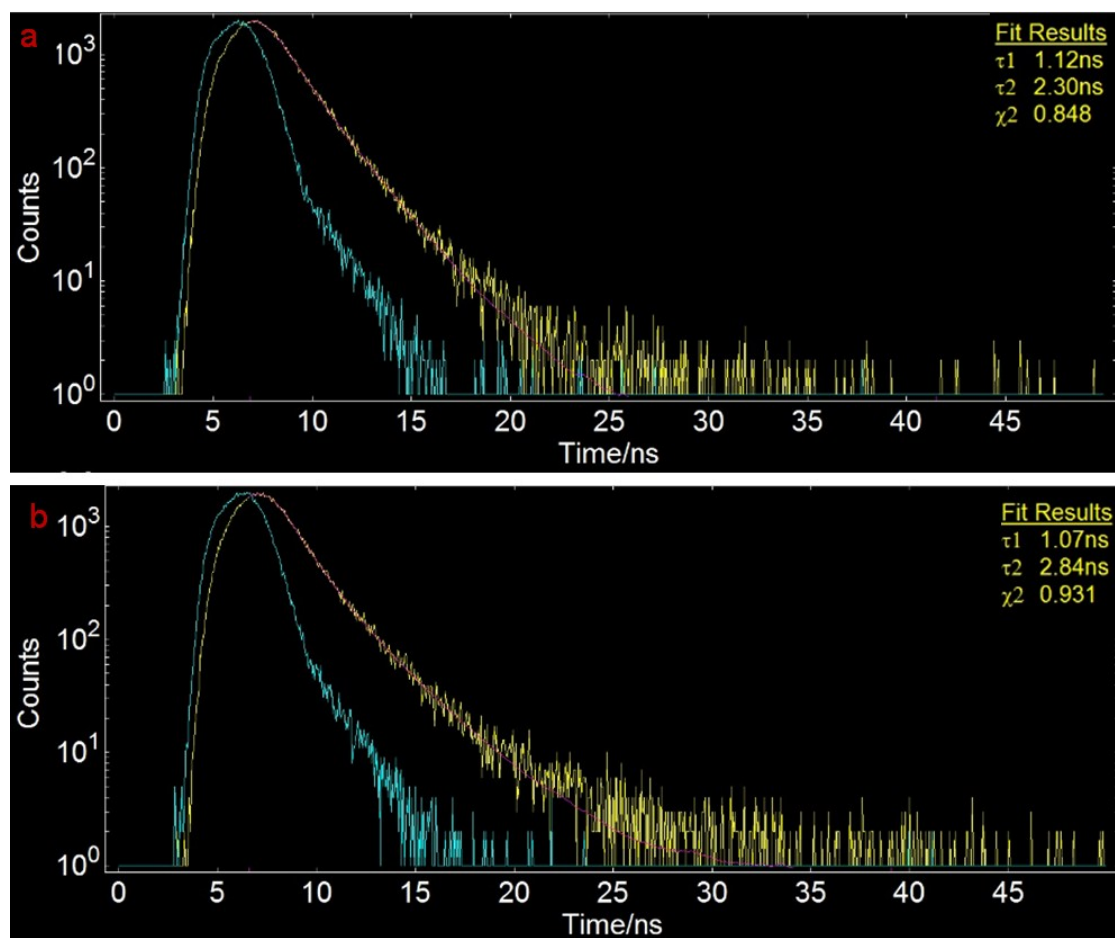

**FigS5.** The fluorescence lifetime spectra of COOH-TPA: original powder (a) and ground powder (b)

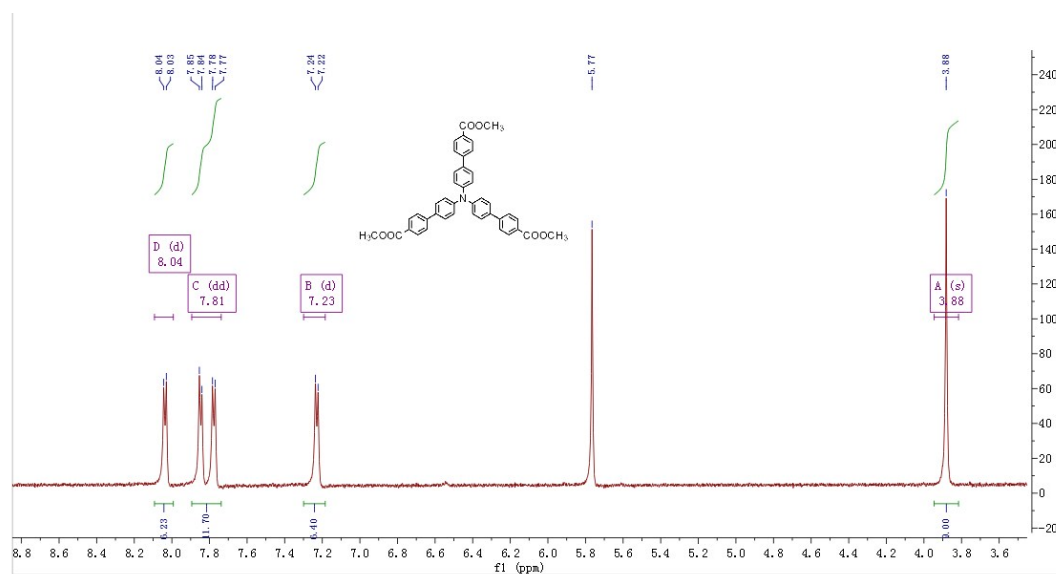

**Fig. S6.** <sup>1</sup>H NMR of Ester-TPA.

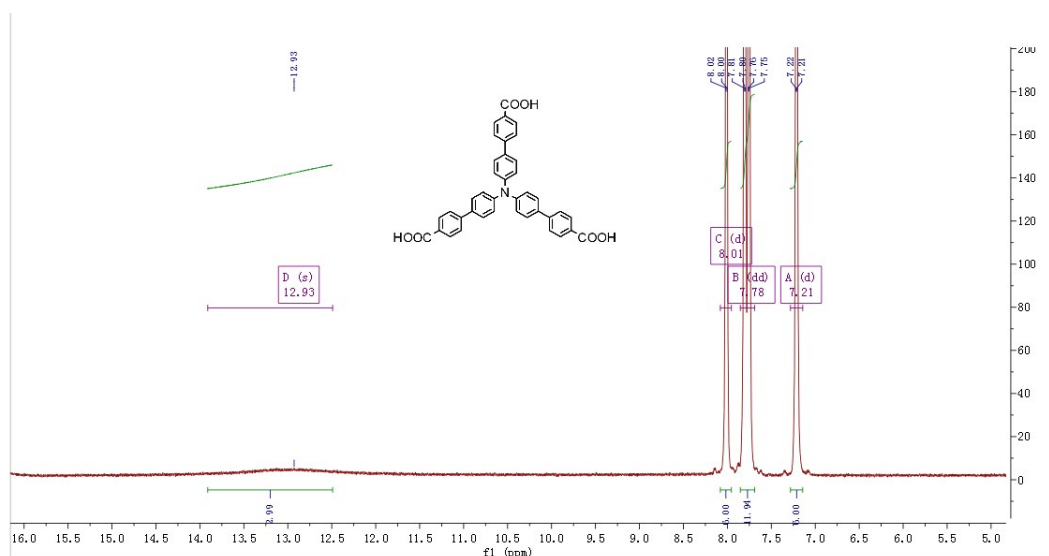

**Fig. S7.** <sup>1</sup>H NMR of COOH-TPA.

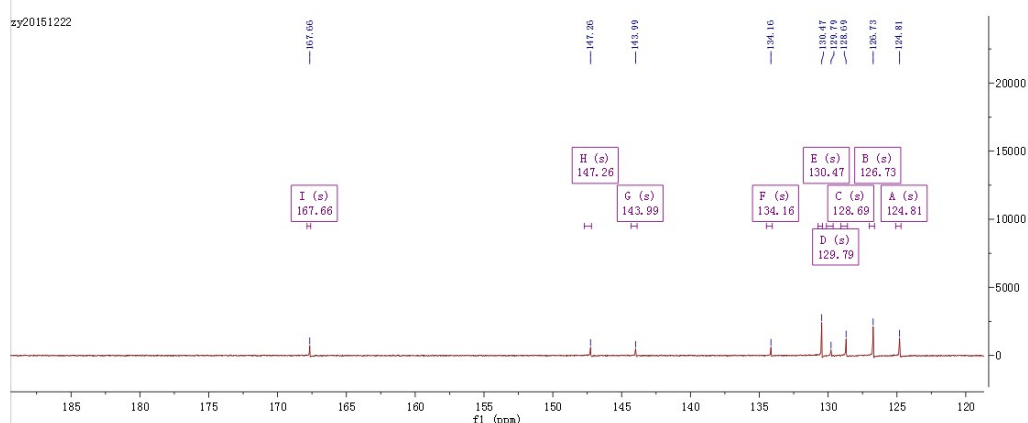

**Fig. S8.** <sup>13</sup>C NMR of COOH-TPA.
